# Supplementary material
Source: PubMed Central journal article supplement (PMC6601102)
Supplement: 2018_209486-Disclosures_and_Contributions.pdf [file 2018_209486-Disclosures_and_Contributions.pdf]

Haematologica  
HAEMATOL/2018/209486  
Version 3

Allogeneic transplantation in high-risk chronic lymphocytic leukemia: a  
single-center intent-to-treat analysis

Almuth Hoffmann, Sascha Dietrich, Susanne Hain, Michael Rieger, Ute  
Hegenbart, Leopold Sellner, Anthony Ho, Carsten Müller-Tidow, and  
Peter Dreger

Disclosures: None

Contributions: PD designed and supervised the study, AH and PD analyzed data, wrote the manuscript and contributed patients, SD, SH, MR, LS, UH, ADH and CMT contributed patients, all authors read and approved the manuscript.
